# Supplementary material
Source: Springer Nature journal article supplement (https://www.springermedizin.de/resource/supplementary/12971_2010_96_MOESM2_ESM.pdf/9595394)
Supplement: MOESM2 [file 9595394]

578 abstracts screened for inclusion after searching with  
“nicotine” AND “smoking” AND “gum” OR “Patch” OR “spray”  
OR “inhalers” OR “Tablet” OR “lozenge” AND “clinical trial”

366 abstracts  
excluded as irrelevant

212 full text paper publications  
retrieved for potential inclusion

92 studies were further excluded:

- 21: duplicated studies
- 62: no NRT side effects reported
- 3: NRT in treatment of smokeless tobacco users
- 4: no clinical data but experimental data instead.

120 studies included:  
92 RCTs  
28 studies considered  
observational
